# Supplementary material
Source: Royal Society of Chemistry journal article supplement (doi:10.1039/d5ma01301a)
Supplement: d5ma01301a1.pdf [file d5ma01301a1.pdf]

## Supporting information

### Engineered CuO-GO Reinforced PVA/CS Electrospun Nanofibers with Enhanced Physicochemical, Hemocompatible, and Wound Healing Performance

*Raymond Shikuku, Mohammed Abul Hasnat, and M. Nuruzzaman Khan\**

Department of Applied Chemistry and Chemical Engineering, Faculty of Engineering and Technology, University of Dhaka, Dhaka-1000, Bangladesh

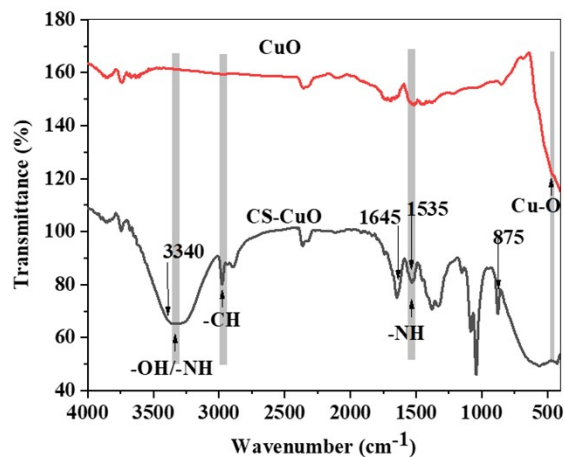

Figure S1. The ATR-FTIR spectra of chitosan-capped CuO and CuO NPs show that the organic groups of CS were decomposed during calcination at 600 °C for 4 h.

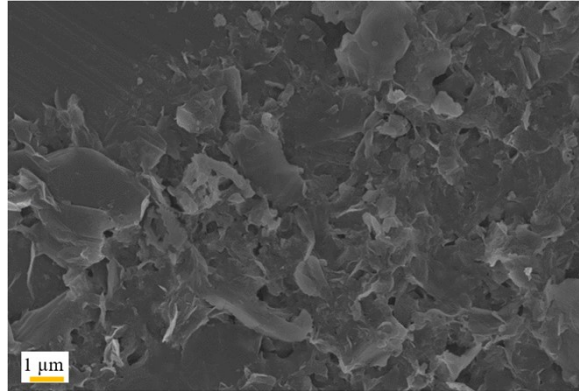

Figure S2. SEM images of GO flakes

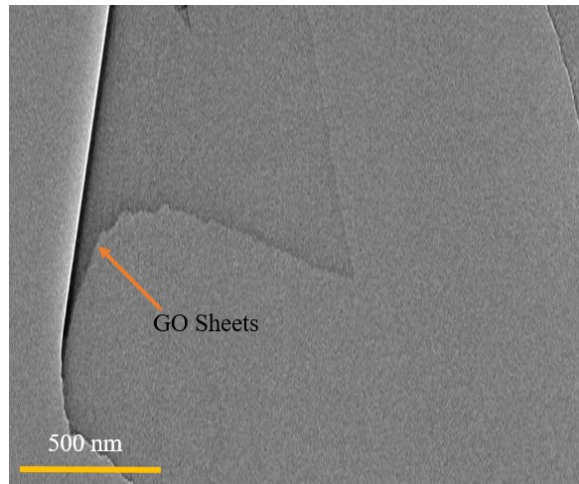

Figure S3. TEM images of GO sheets

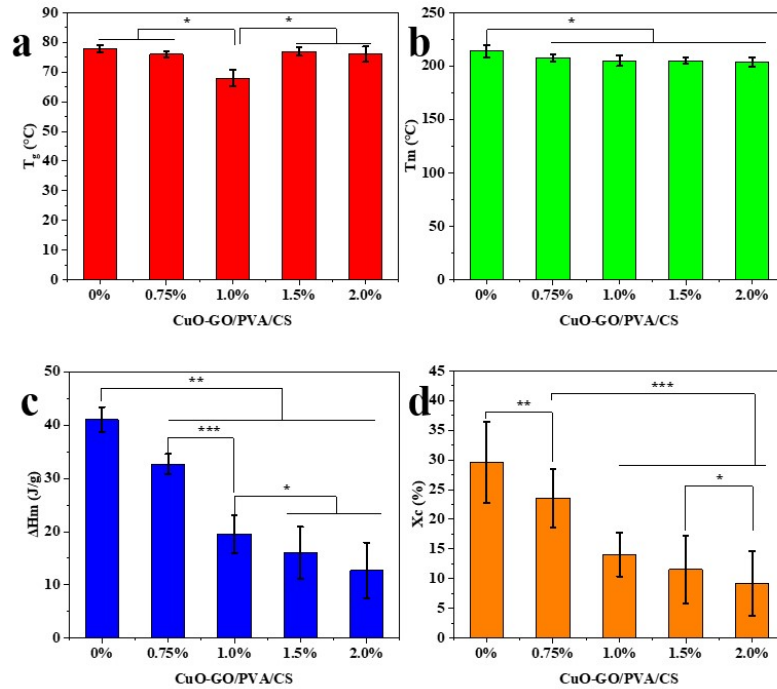

Figure S4. Figure. (a) glass transition temperature ( $T_g$ ), (b) melting temperature ( $T_m$ ), (c) enthalpy of melting ( $\Delta H_m$ ), and (d) degree of crystallinity ( $X_c$ ) as determined from DSC measurements. Data are presented as mean  $\pm$  standard deviation, and statistical significance was evaluated by appropriate comparative analysis between groups. Statistical differences are denoted as  $p < 0.05$  (\*),  $p < 0.01$  (\*\*), and  $p < 0.001$  (\*\*\*)

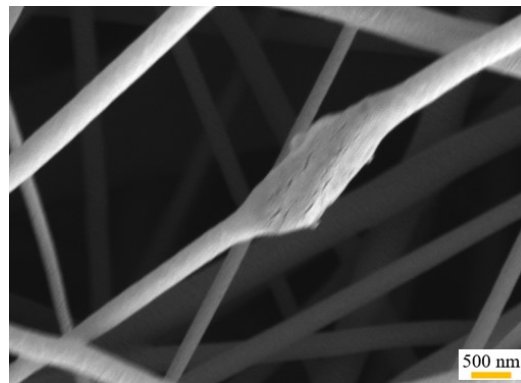

Figure S5. Cropped SEM micrograph of the electrospun nanofiber highlighting the porous region where CuO–GO nanocomposites are embedded; scale bar retained from figure 5c1, the yellow arrow highlights the nanofiber roughening as a result of lodged CuO–GO NCs.

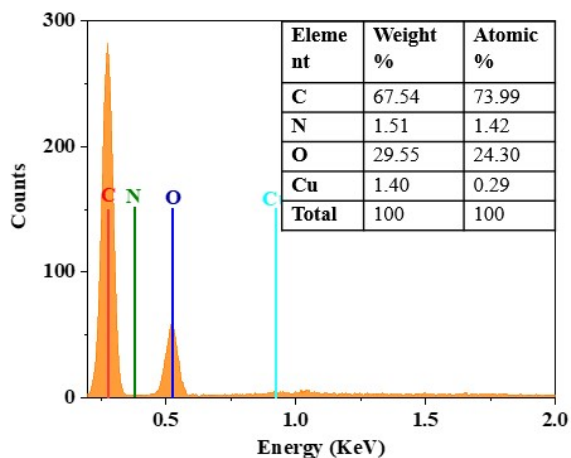

Figure S6. EDX of the 2 wt.% CuO–GO incorporated PVA/CS nanofibrous mat, the inset table shows the elemental composition.

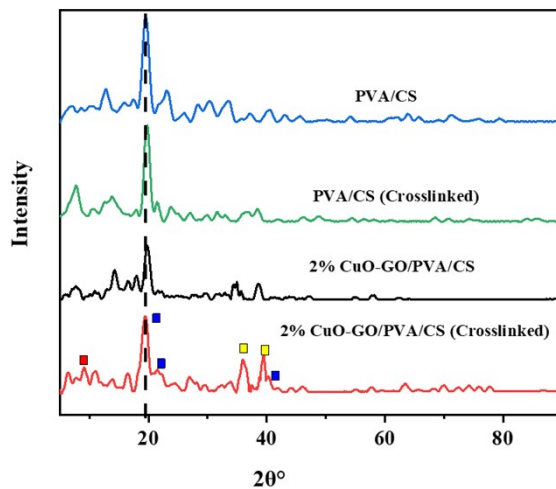

Figure S7. X-ray diffraction (XRD) patterns of PVA/CS, crosslinked PVA/CS, 2 wt% CuO–GO/PVA/CS, and crosslinked 2 wt% CuO–GO/PVA/CS composite mats. The dashed line highlights the dominant diffraction region around  $2\theta \approx 19\text{--}20^\circ$ , arising from overlapping crystalline contributions of PVA and chitosan. Characteristic reflections of CuO are indicated by yellow squares, the main PVA-related

diffraction by blue squares, and the GO-related diffraction by red squares, confirming the successful incorporation of CuO–GO within the PVA/CS matrix and the effect of crosslinking on the overall crystalline ordering.

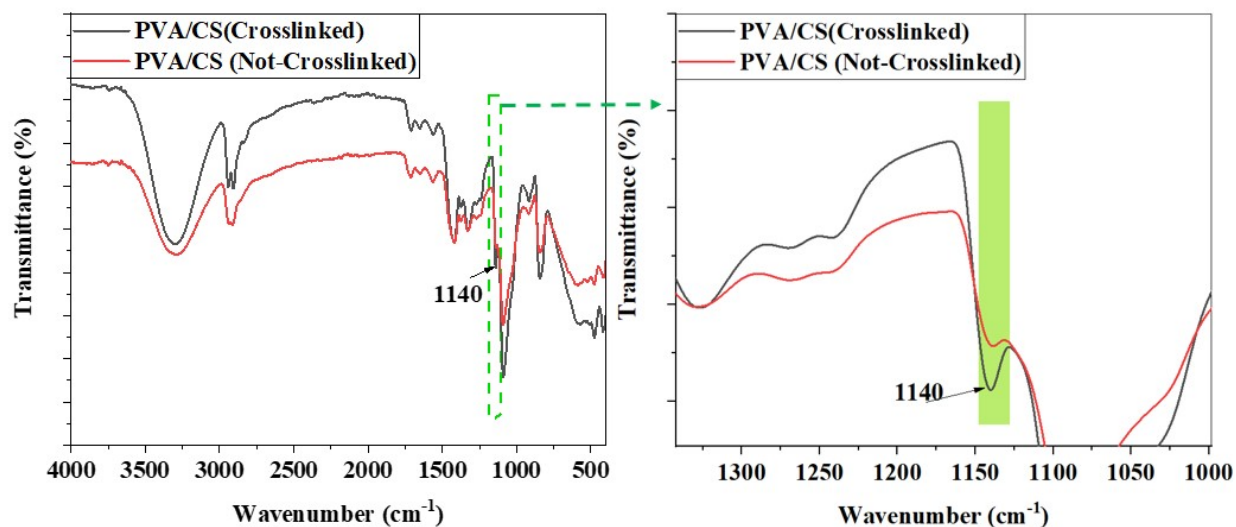

Figure S8. FTIR spectra of PVA/CS nanofibers (a) uncrosslinked (b) crosslinked

Table S1. Comparison to other wound healing concepts and if there is really a gain, or simply another material.

|   | <b>Key Components</b>              | <b>Crosslinking Technique</b> | <b>Tensile Strength</b> | <b>Wound Closure (%)</b> | <b>Ref</b> |
|---|------------------------------------|-------------------------------|-------------------------|--------------------------|------------|
| 1 | PVA/GO nanofibers                  | Glutaraldehyde                | 2.0 → 5.17 MPa          | >90% at day 9            | (1)        |
| 2 | PVA/Iota carrageenan/GO            | -                             | 3 ± 0.01 MPa            | 100% at day 21           | (2)        |
| 3 | PVA/CS/GO/TiO <sub>2</sub> /CQD    | glutaraldehyde                | 3.8 → 9.0 MPa           | 93.137 % at day 14       | (3)        |
| 4 | Manuka honey/PVP/Chitosan/titanate | -                             | -                       | 100% at day 12           | (4)        |

|    |                                  |                         |                  |                 |      |
|----|----------------------------------|-------------------------|------------------|-----------------|------|
| 5  | PVA/gelatin                      | Citric acid crosslinked | 10.28 → 7.76 MPa | >94% at day 14  | (5)  |
| 6  | PVA/CS                           | -                       | 8.9 → 1.5 MPa    | 98% at day 10   | (6)  |
| 7  | Ursolic acid/CS/PVA              | -                       | -                | 99.8% at day 18 | (7)  |
| 8  | Curcumin/carbon nanospheres/ PVA | -                       | -                | 99% at day 14   | (8)  |
| 9  | PVA/PEO/L-Arg/Zn-MOF             | -                       | 23.33 → 37.99 N  | 100% at day 21  | (9)  |
| 10 | ZnO/CS/PVA                       | -                       | -                | 90.5% at day 12 | (10) |
| 11 | CuO-GO/PVA/CS                    | Thermal                 | 2.5 → 7.8 MPa    | 100% at day 14  |      |

#### References:

1. Zhang Q, Du Q, Zhao Y, Chen F, Wang Z, Zhang Y, et al. Graphene oxide-modified electrospun polyvinyl alcohol nanofibrous scaffolds with potential as skin wound dressings. *RSC Adv.* 2017;7(46):28826–36.
2. Gouda MH, Ali SM, Othman SS, A. Abd Al-Aziz S, Abu-Serie MM, Elsokary NA, et al. Novel scaffold based graphene oxide doped electrospun iota carrageenan/polyvinyl alcohol for wound healing and pathogen reduction: in-vitro and in-vivo study. *Sci Rep.* 2021;11(1):20456.
3. Norouzi F, Pourmadadi M, Yazdian F, Khoshmaram K, Mohammadnejad J, Sanati MH, et al. PVA-Based Nanofibers Containing Chitosan Modified with Graphene Oxide and Carbon Quantum Dot-Doped TiO<sub>2</sub> Enhance Wound Healing in a Rat Model. *J Funct Biomater* [Internet]. 2022 Dec 15;13(4):300. Available from: <https://www.mdpi.com/2079-4983/13/4/300>

4. Kassem LM, El-Deen AG, Zaki AH, El-Dek SI. Electrospun manuka honey@PVP nanofibers enclosing chitosan-titanate for highly effective wound healing. *Cellulose*. 2023;30(10):6487–505.
5. Temel-Soylu TM, Keçeciler-Emir C, Rababah T, Özel C, Yücel S, Basaran-Elalmis Y, et al. Green Electrospun Poly(vinyl alcohol)/Gelatin-Based Nanofibrous Membrane by Incorporating 45S5 Bioglass Nanoparticles and Urea for Wound Dressing Applications: Characterization and In Vitro and In Vivo Evaluations. *ACS Omega*. 2024 May;9(19):21187–203.
6. Charernsriwilaiwat N, Rojanarata T, Ngawhirunpat T, Opanasopit P. Electrospun chitosan/polyvinyl alcohol nanofibre mats for wound healing. *Int Wound J*. 2014 Apr;11(2):215–22.
7. Lv H, Zhao M, Li Y, Li K, Chen S, Zhao W, et al. Electrospun Chitosan-Polyvinyl Alcohol Nanofiber Dressings Loaded with Bioactive Ursolic Acid Promoting Diabetic Wound Healing. *Nanomater (Basel, Switzerland)*. 2022 Aug;12(17).
8. Roopesh M, Davis D, Jyothi MS, Vandana M, Thippeswamy BS, Hegde G, et al. Wound healing efficacy of curcumin-loaded sandalwood bark-derived carbon nanosphere/PVA nanofiber matrix. *RSC Adv*. 2023;13(35):24320–30.
9. Kenawy E-R, Ghaly ZS, Kamoun EA, Yousuf WE, Shokr AM, Salib YS, et al. Zinc-based metal organic framework loaded-electrospun PVA/PEO/l-arginine nanofibers as efficient antimicrobial scaffolds for burn skin wound healing. *Mater Adv*. 2025;6(20):7282–96.
10. Ahmed R, Tariq M, Ali I, Asghar R, Noorunnisa Khanam P, Augustine R, et al. Novel electrospun chitosan/polyvinyl alcohol/zinc oxide nanofibrous mats with antibacterial and

antioxidant properties for diabetic wound healing. *Int J Biol Macromol.* 2018 Dec 1;120:385–93.
